# Supplementary material for: The induction of poly(vinylidene fluoride) electroactive phase by modified anodic aluminum oxide template nanopore surface
Source: Royal Society of Chemistry journal article supplement (doi:10.1039/c5ra10309f), 2015-01-01
Supplement: c5ra10309f1.pdf [file c5ra10309f1.pdf]

*Electronic Supplementary Information for*

## **The induction of poly(vinylidene fluoride) electroactive phase by modified anodic aluminum oxide template nanopores surface**

**Chao Fu,<sup>ab</sup> Xuemei Wang,<sup>a</sup> Xiang Shi,<sup>ab</sup> and Xianghai Ran,<sup>a\*</sup>**

<sup>a</sup> Lab of Polymer Composites Engineering, Changchun Institute of Applied Chemistry, Chinese Academy of Sciences, Changchun 130022, China.

E-mail: ranxh@ciac.jl.cn;

Fax: +86 431 85262424; Tel: +86 431 85262677

<sup>b</sup> University of Chinese Academy of Sciences, Beijing 100049, China

The surface element of modified template was examined by X-ray photoelectron spectra (ThermoVG ESCALAB 250 spectrometer). Fig. S1 shows the XPS survey spectra of the cross sections of the pristine and APMS modified AAO templates. Compared with the pristine templates, the modified ones demonstrated Si 2p peak at 102 eV and N 1s peak at 400 eV. This result confirms the covalent attachment of the aminolsilane to the nanopores surface. AFM phase images of templates are shown in Fig. S2.

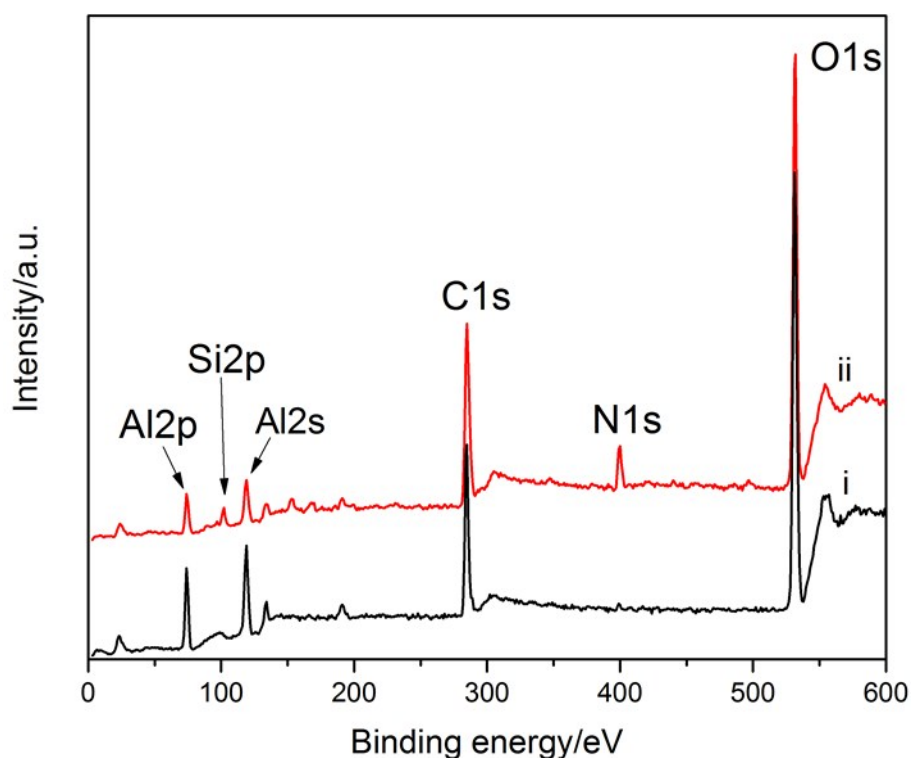

**Figure S1.** XPS spectra of bare (i) and PVDF nanowires filled (ii) pristine AAO template

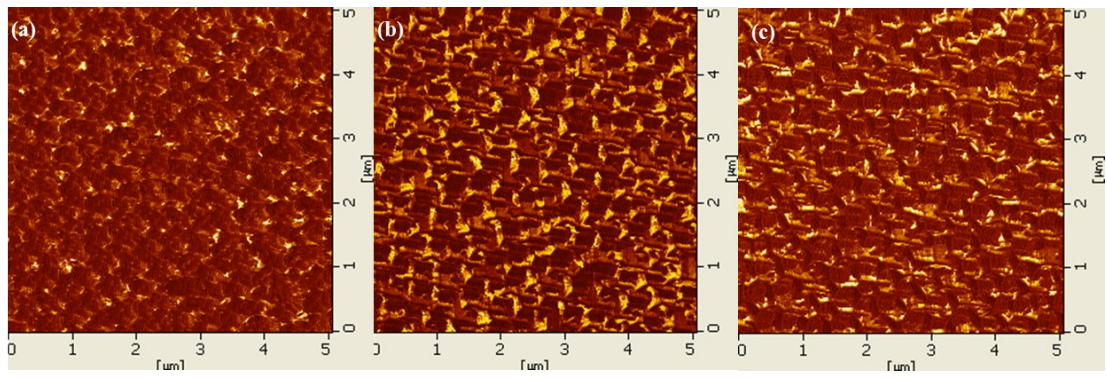

**Figure S2.** Phase images of oxygen plasma treatment (a), pristine (b) and APMS modified (c) AAO templates.
